# Supplementary material for: Meta-analysis of tick-borne and other pathogens: Co-infection or co-detection? That is the question
Source: PubMed Central journal article supplement — Curr Res Parasitol Vector Borne Dis. 2024 Oct 5;6:100219. doi: 10.1016/j.crpvbd.2024.100219 (PMC11525461; doi:10.1016/j.crpvbd.2024.100219), 2024-10-05
Supplement: mmc3.pdf [file mmc3.pdf]

**Supplementary Table S3.** Case definition of co-infection in humans.

|                       | <b>Human granulocytic anaplasmosis</b>                                                                                                                                                                                                                                                                                                                                                                                                                                                                                                                                                                                                                                                                                              | <b>Tick-borne encephalitis</b>                                                                                                                                                                                                                                                                                                                                                                                                                                                                                                                                                                                                                                               | <b>Rickettsiosis</b>                                                                                                                                                                                                                                                                                                                                                                                                                                                     | <b>Human babesiosis</b>                                                                                                                                                                                                                                                                                                                                                                                                                                                                                                                                                                                            |
|-----------------------|-------------------------------------------------------------------------------------------------------------------------------------------------------------------------------------------------------------------------------------------------------------------------------------------------------------------------------------------------------------------------------------------------------------------------------------------------------------------------------------------------------------------------------------------------------------------------------------------------------------------------------------------------------------------------------------------------------------------------------------|------------------------------------------------------------------------------------------------------------------------------------------------------------------------------------------------------------------------------------------------------------------------------------------------------------------------------------------------------------------------------------------------------------------------------------------------------------------------------------------------------------------------------------------------------------------------------------------------------------------------------------------------------------------------------|--------------------------------------------------------------------------------------------------------------------------------------------------------------------------------------------------------------------------------------------------------------------------------------------------------------------------------------------------------------------------------------------------------------------------------------------------------------------------|--------------------------------------------------------------------------------------------------------------------------------------------------------------------------------------------------------------------------------------------------------------------------------------------------------------------------------------------------------------------------------------------------------------------------------------------------------------------------------------------------------------------------------------------------------------------------------------------------------------------|
|                       | Adapted from Dahlgren et al. (2015)                                                                                                                                                                                                                                                                                                                                                                                                                                                                                                                                                                                                                                                                                                 | Adapted from EU (2012)                                                                                                                                                                                                                                                                                                                                                                                                                                                                                                                                                                                                                                                       | Adapted from Portillo et al. (2017)                                                                                                                                                                                                                                                                                                                                                                                                                                      | Adapted from Krause et al. (2021)                                                                                                                                                                                                                                                                                                                                                                                                                                                                                                                                                                                  |
| <b>Confirmed case</b> | <p><b>Clinical criteria:</b></p> <p>Fever and at least one of the following symptoms: headache, myalgia, malaise, anemia, leukopenia, thrombocytopenia, or elevated hepatic transaminases.</p> <p><b>and one or more laboratory criteria for diagnosis:</b></p> <ul style="list-style-type: none"> <li>- A fourfold or greater increase in IgG titer by IFA observed in paired serum samples (with acute serum collected within the first week of illness and convalescent serum collected 2-4 weeks later).</li> <li>- Identification of DNA in blood by PCR.</li> <li>- Detection of antigen in a biopsy or autopsy by immunohistochemical (IHC) techniques.</li> <li>- Isolation by culture from a clinical specimen.</li> </ul> | <p><b>Clinical criteria:</b></p> <p>Inflammation of the CNS (e.g. meningitis, meningoencephalitis, encephalomyelitis, encephaloradiculitis).</p> <p><b>and one or more laboratory criteria for diagnosis:</b></p> <ul style="list-style-type: none"> <li>- Detection of both TBE-specific IgM and IgG antibodies in the bloodstream.</li> <li>- Presence of TBE-specific IgM antibodies in cerebrospinal fluid.</li> <li>- Serological conversion or a 4-fold rise in TBE-specific antibodies in matched serum samples.</li> <li>- Identification of TBE viral nucleic acid in a clinical sample.</li> <li>- Isolation of the TBE virus from a clinical specimen.</li> </ul> | <p><b>Clinical criteria:</b></p> <p>Fever, rash, and eschar with different combinations.</p> <p><b>and one or more laboratory criteria for diagnosis:</b></p> <ul style="list-style-type: none"> <li>- Positive PCR and/or culture in blood or skin biopsy samples.</li> <li>- Positive results in immunohistochemical assays conducted on tissues.</li> <li>- Seroconversion or a fourfold increase in specific antibodies observed in paired serum samples.</li> </ul> | <p><b>Clinical criteria:</b></p> <p>Fever, fatigue, chills, sweats, headache, and anorexia, and characteristic routine laboratory test abnormalities (anemia, thrombocytopenia, elevated liver enzymes, and/or evidence of intravascular hemolysis).</p> <p><b>and one or more laboratory criteria for diagnosis:</b></p> <ul style="list-style-type: none"> <li>- Positive PCR result detected in blood.</li> <li>- Presence of intraerythrocytic Babesia parasites observed on blood smear.</li> <li>- Seroconversion or a fourfold increase in specific antibodies detected in paired serum samples.</li> </ul> |
| <b>Probable case</b>  | <p><b>Clinical criteria and one supportive serology result:</b></p> <ul style="list-style-type: none"> <li>- Elevated IgG or IgM titers.</li> <li>- Presence of morulae in the cytoplasm of neutrophils or eosinophils.</li> </ul>                                                                                                                                                                                                                                                                                                                                                                                                                                                                                                  | <p><b>Clinical criteria and one supportive serology result:</b></p> <ul style="list-style-type: none"> <li>- Identification of TBE-specific IgM antibodies in a singular serum sample.</li> </ul>                                                                                                                                                                                                                                                                                                                                                                                                                                                                            | <p><b>Clinical criteria and one supportive serology result:</b></p> <ul style="list-style-type: none"> <li>- Elevated IgG and IgM titers.</li> </ul>                                                                                                                                                                                                                                                                                                                     | <p><b>Clinical criteria and one supportive serology result:</b></p> <ul style="list-style-type: none"> <li>- Elevated titer of specific serum IgG &gt;1/1024.</li> <li>- Elevated titer of specific serum IgM.</li> </ul>                                                                                                                                                                                                                                                                                                                                                                                          |

|                       | <b>Erythema migrans</b>                                                                                                                                                                                                                                                                                                                                                                                                                                                                                                                                                                              | <b>Lyme neuroborreliosis (LNB)</b>                                                                                                                                                                                                                                                                                                                                                                                                                                                                                           | <b>Lyme arthritis</b>                                                                                                                                                                                                                                                                                                                                                                                                                                                                                                                                  | <b>Acrodermatitis chronica atrophicans (ACA)</b>                                                                                                                                                                                                                                                                                                                                                                                                                                                                                                                            | <b>Lyme carditis</b>                                                                                                                                                                                                                                                                                                                                                                                                                                                        |
|-----------------------|------------------------------------------------------------------------------------------------------------------------------------------------------------------------------------------------------------------------------------------------------------------------------------------------------------------------------------------------------------------------------------------------------------------------------------------------------------------------------------------------------------------------------------------------------------------------------------------------------|------------------------------------------------------------------------------------------------------------------------------------------------------------------------------------------------------------------------------------------------------------------------------------------------------------------------------------------------------------------------------------------------------------------------------------------------------------------------------------------------------------------------------|--------------------------------------------------------------------------------------------------------------------------------------------------------------------------------------------------------------------------------------------------------------------------------------------------------------------------------------------------------------------------------------------------------------------------------------------------------------------------------------------------------------------------------------------------------|-----------------------------------------------------------------------------------------------------------------------------------------------------------------------------------------------------------------------------------------------------------------------------------------------------------------------------------------------------------------------------------------------------------------------------------------------------------------------------------------------------------------------------------------------------------------------------|-----------------------------------------------------------------------------------------------------------------------------------------------------------------------------------------------------------------------------------------------------------------------------------------------------------------------------------------------------------------------------------------------------------------------------------------------------------------------------|
|                       | Adapted from Stanek et al. (2011)                                                                                                                                                                                                                                                                                                                                                                                                                                                                                                                                                                    |                                                                                                                                                                                                                                                                                                                                                                                                                                                                                                                              |                                                                                                                                                                                                                                                                                                                                                                                                                                                                                                                                                        |                                                                                                                                                                                                                                                                                                                                                                                                                                                                                                                                                                             |                                                                                                                                                                                                                                                                                                                                                                                                                                                                             |
| <b>Confirmed case</b> | <p><b>Clinical criteria:</b></p> <p>A clinician diagnoses a "typical erythema migrans" rash, i.e., expanding red or bluish-red patch at least 5 cm in diameter may appear, sometimes accompanied by a central clearing. The advancing edge is usually well defined, often intensely coloured and not significantly raised from the surrounding skin</p> <p><b>and one or more laboratory criteria for diagnosis:</b></p> <ul style="list-style-type: none"> <li>- Detection of <i>B. burgdorferi</i> (<i>s.l.</i>) by culture from skin biopsy.</li> <li>- Positive PCR from skin biopsy.</li> </ul> | <p><b>Clinical criteria:</b></p> <p>In adults, meningo-radiculitis and meningitis are the most common, encephalitis and myelitis are less common, and cerebral vasculitis is extremely rare. In children, meningitis and facial palsy are the most common manifestations</p> <p><b>and two laboratory criteria for diagnosis:</b></p> <ul style="list-style-type: none"> <li>- Cerebrospinal fluid pleocytosis and demonstration of intrathecal specific antibody synthesis or positive PCR from CSF (early LNB).</li> </ul> | <p><b>Clinical criteria:</b></p> <p>A clinician diagnoses recurrent attacks or persistent objective joint swelling in one or a few large joints after ruling out alternative explanations</p> <p><b>and one or more laboratory criteria for diagnosis:</b></p> <ul style="list-style-type: none"> <li>- Detection of <i>B. burgdorferi</i> (<i>s.l.</i>) by culture from synovial fluid and/or tissue.</li> <li>- Positive PCR from synovial fluid and/or tissue.</li> <li>- Specific serum IgG antibodies, usually in high concentrations.</li> </ul> | <p><b>Clinical criteria:</b></p> <p>ACA typically manifests as long-standing red or bluish-red lesions on limb extensor surfaces, initially with swelling, which may later become atrophic. Skin induration and fibroid nodules over bony prominences are possible</p> <p><b>and one or more laboratory criteria for diagnosis:</b></p> <ul style="list-style-type: none"> <li>- Detection of <i>B. burgdorferi</i> (<i>s.l.</i>) by culture from skin biopsy.</li> <li>- Positive PCR from skin biopsy.</li> <li>- High level of specific serum IgG antibodies.</li> </ul> | <p><b>Clinical criteria:</b></p> <p>Any sudden AV conduction abnormalities (grades I-III), rhythm disturbances and possible myocarditis or pancarditis should be investigated to rule out other causes</p> <p><b>and one or more laboratory criteria for diagnosis:</b></p> <ul style="list-style-type: none"> <li>- Detection of <i>B. burgdorferi</i> (<i>s.l.</i>) by culture from endomyocardial biopsy.</li> <li>- Positive PCR from endomyocardial biopsy.</li> </ul> |
| <b>Probable case</b>  | <p><b>Clinical criteria and one or more supportive serology result:</b></p> <ul style="list-style-type: none"> <li>- Non-typical erythema migrans diagnosed by a clinician or compatible lesion reported by a patient after a tick bite.</li> <li>- Seroconversion or a fourfold rise in specific antibodies between paired serum samples.</li> <li>- Elevated levels of IgG or IgM antibodies.</li> </ul>                                                                                                                                                                                           | <p><b>Clinical criteria and one or more supportive serology result:</b></p> <ul style="list-style-type: none"> <li>- Cerebrospinal fluid pleocytosis.</li> <li>- Demonstration of intrathecal specific antibody synthesis or positive PCR from CSF (early LNB).</li> <li>- After a duration of evolution <math>\geq 6</math> weeks, there have to be found specific IgG antibodies in the serum.</li> </ul>                                                                                                                  | <p><b>Clinical criteria and one supportive serology result:</b></p> <ul style="list-style-type: none"> <li>- High levels of specific serum IgG antibodies.</li> </ul>                                                                                                                                                                                                                                                                                                                                                                                  | <p><b>Clinical criteria and one supportive serology result:</b></p> <ul style="list-style-type: none"> <li>- High levels of specific serum IgG antibodies.</li> </ul>                                                                                                                                                                                                                                                                                                                                                                                                       | <p><b>Clinical criteria and one supportive serology result:</b></p> <ul style="list-style-type: none"> <li>- Recent or concomitant erythema migrans and/or neurologic disorders.</li> <li>- Specific serum IgG antibodies.</li> </ul>                                                                                                                                                                                                                                       |
